# Supplementary material
Source: publisher figshare collection journal article supplement (https://gsajournals.figshare.com/articles/dataset/_/8993831)
Supplement: Supplementary file 1 [file 1]

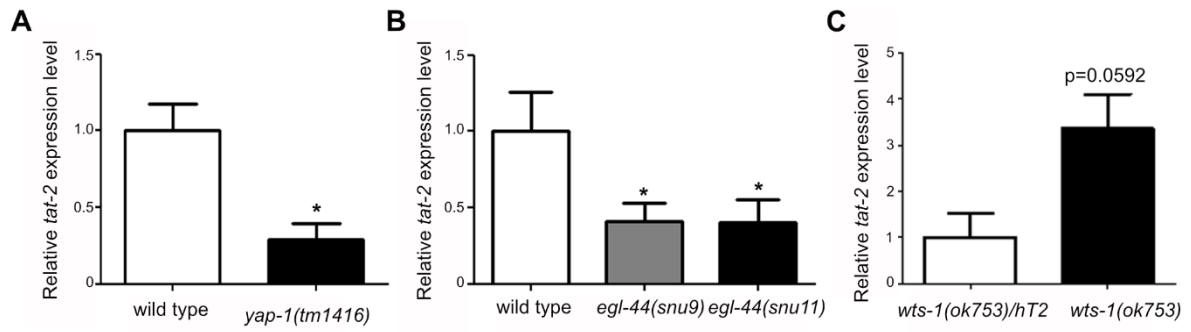

**Figure S5. *tat-2* as a candidate of *yap-1* and *egl-44* target.** (A,B) Relative mRNA expression level of *tat-2*. *tat-2* expression was consistently decreased in *yap-1(tm1416)*, *egl-44(ys39)*, and *egl-44(ys41)* embryos compared to that in wild type N2 embryos. Total RNA was extracted from embryos of each mutant, then relative *tat-2* mRNA levels were measured using quantitative real time PCR. Three biological replicates were used for the test. Data: Mean  $\pm$  S.E.M. Student's t-test was performed to measure statistical significance. \*  $p < 0.05$ . (C) Relative *tat-2* expression levels in *wts-1(ok753)/+* heterozygous mutants and *wts-1(ok753)* homozygous mutants. Total RNA was extracted from L1-stage worms of each mutant, then relative *tat-2* mRNA level was measured by quantitative real time PCR. Three biological replicates were used for the test. Data : Mean  $\pm$  S.E.M. Student's t-test was used to measure statistical significance.
