# Supplementary material
Source: publisher figshare collection journal article supplement (https://gsajournals.figshare.com/articles/dataset/_/8993831)
Supplement: Supplementary file 2 [file 1]

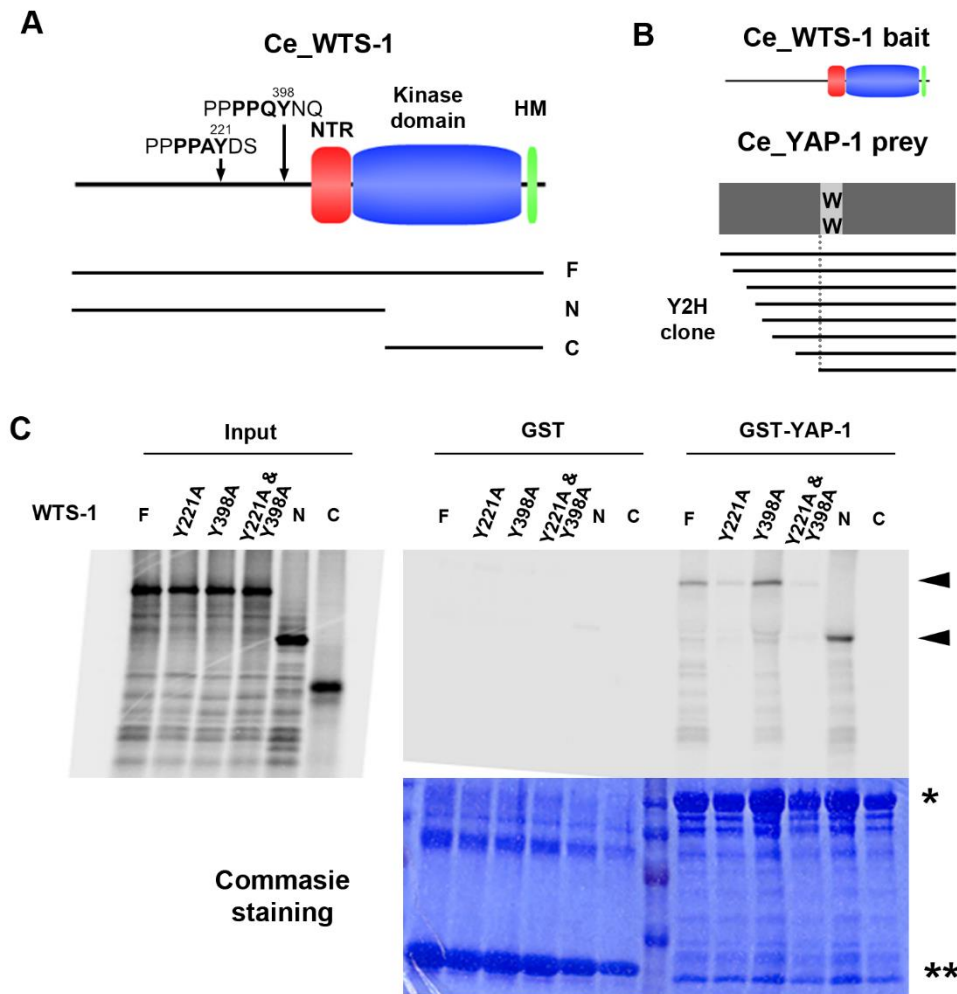

**Figure S1. WTS-1 and YAP-1 bind to each other.** (A) Schematic diagram of the WTS-1 derivatives for the GST-pulldown assay. ‘F’: full length, ‘N’: N-terminus, which ends near the start position of the kinase domain and ‘C’: C-terminus, which starts from the end of the ‘N’ construct of WTS-1. WTS-1 has two putative PPxY motifs that have Y221 and Y398 in N-terminal region. (B) Isolation of YAP-1 as a WTS-1 binding protein in unbiased yeast two-hybrid screens. Top: schematic structure of YAP-1; bottom: eight independent interacting preys from the screen. (C) Interactions of *in-vitro*-synthesized <sup>35</sup>S-Met-labeled full length, N-terminus, or C-terminus WTS-1 with GST or GST-YAP-1. Y221A, Y398A: Y to A mutations on PPxY motif of WTS-1. Arrowhead: bound WTS-1; ‘\*’: GST-YAP-1; and ‘\*\*’: GST.
