# Supplementary material
Source: publisher figshare collection journal article supplement (https://gsajournals.figshare.com/articles/dataset/_/8993831)
Supplement: Supplementary file 3 [file 1]

**Table S1. Results of yeast two hybrid screening using WTS-1 as a bait.**

| 1. Number of Colonies Screened |                           |                            |                                      |                                                                |
|--------------------------------|---------------------------|----------------------------|--------------------------------------|----------------------------------------------------------------|
| Number of Colonies             |                           |                            |                                      |                                                                |
| 1 <sup>st</sup>                | 2 <sup>nd</sup>           |                            |                                      |                                                                |
| 2.63x10 <sup>6</sup>           | 1.27x10 <sup>7</sup>      |                            |                                      |                                                                |
| 2. Screening Result            |                           |                            |                                      |                                                                |
| Number of Colonies             |                           |                            |                                      |                                                                |
|                                | 1 <sup>st</sup>           | 2 <sup>nd</sup>            |                                      |                                                                |
| Reporter I ( <i>URA3</i> )     | 27                        | 890                        |                                      |                                                                |
| Reporter II ( <i>lacZ</i> )    | 16                        | 204                        |                                      |                                                                |
| Reporter III ( <i>ADE2</i> )   | 8                         | 204                        |                                      |                                                                |
| Real Positives                 | 3 out of 27<br>candidates | 33 out of 60<br>candidates |                                      |                                                                |
| 3. The list of preys           |                           |                            |                                      |                                                                |
| ORF name                       | Common<br>name            | Full<br>length             | Fusion site (a.a)                    | Description                                                    |
| F21C10.7                       |                           | 2541                       | 2219                                 | Titin homolog                                                  |
| W04D2.1                        | <i>atn-1</i>              | 894                        | 307, 349                             | Actinin homolog                                                |
| F52E1.7                        | <i>hsp-17</i>             | 148                        | 1, 2                                 | A member of the hsp20                                          |
| F13E6.4                        | <i>yap-1</i>              | 442                        | 1, 8, 70, 132, 143,<br>159, 184, 203 | YAP homolog                                                    |
| R06F6.12                       |                           | 417                        | 2, 4, 58, 119, 128                   | Unknown protein                                                |
| Y66H1B.3                       | <i>fln-1</i>              | 1084                       | 767                                  | Filamin A, homolog                                             |
| F19C7.1                        |                           | 266                        | 1                                    | Unknown protein                                                |
| K01A6.2                        | <i>magi-1</i>             | 1092                       | 273                                  | MAGUK protein                                                  |
| C56G2.7                        |                           | 374                        | 9                                    | 26S proteasome complex<br>ubiquitin receptor, subunit<br>Rpn13 |
| C14F11.5                       | <i>hsp-43</i>             | 368                        | 1                                    | A member of the hsp20 family                                   |
