# Supplementary material
Source: publisher figshare collection journal article supplement (https://gsajournals.figshare.com/articles/dataset/_/8993831)
Supplement: Supplementary file 4 [file 1]

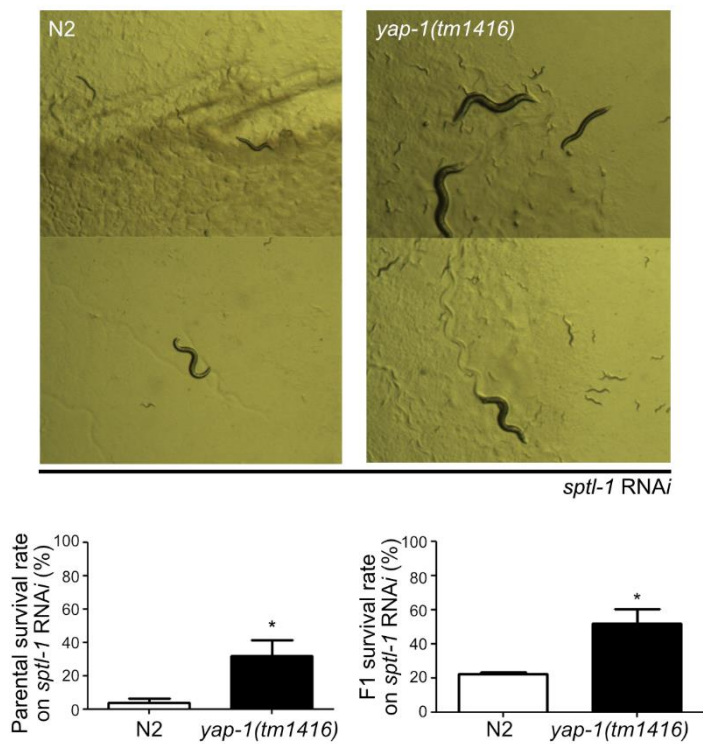

**Figure S6. Sphingolipid deficiency-mediated phenotype analysis of *yap-1(tm1416)*.** Sphingolipid deficiency caused by *sptl-1* RNAi resulted in organismal lethality. Loss of YAP-1 partially suppressed lethality mediated by lipid deficiency both in parents and in progeny. Feeding RNAi was done as described previously (Seamen et al., 2009). Student's t-test was used to measure statistical significance.

\*  $p < 0.05$ .
