# Supplementary material
Source: publisher figshare collection journal article supplement (https://gsajournals.figshare.com/articles/dataset/_/8993831)
Supplement: Supplementary file 5 [file 1]

**Table S2. Results of microarray; list of genes whose expression was affected in the absence of YAP-1.**

| Average Fold Change | P-Value  | ORF name  | Gene name      | Description                                                                                       |
|---------------------|----------|-----------|----------------|---------------------------------------------------------------------------------------------------|
| <b>0.320817</b>     | 0.011945 | F32A7.6   | <i>aex-5</i>   | An ortholog of calcium-dependent serine endoproteinases, expressed in muscle cells                |
| <b>0.379255</b>     | 0.02387  | F15E11.13 | <i>pud-1.1</i> | Unknown function, upregulated in <i>daf-2(gf)</i> , expressed in intestine, hypodermis            |
| <b>0.558828</b>     | 0.015171 | F37A4.3   |                |                                                                                                   |
| <b>0.578682</b>     | 0.015112 | H22K11.4  | <i>sgca-1</i>  | An ortholog of the human gene SARCOGLYCAN, expressed in muscle                                    |
| <b>0.639495</b>     | 0.040136 | Y4C6B.3   |                | An ortholog of members of the human SLC (Solute carriers) family                                  |
| <b>0.644521</b>     | 0.031119 | T25G12.9  |                | Transposon origin, removed from <i>C. elegans</i> protein set. Excluded from our analysis         |
| <b>0.64938</b>      | 0.042419 | F28H6.1   | <i>akt-2</i>   | AKT(S/T kinase), expressed in pharynx, several neurons                                            |
| <b>0.651203</b>     | 0.032054 | F58G11.1  | <i>letm-1</i>  | An ortholog of human LETM2, ubiquitously expressed in intestine, neurons                          |
| <b>0.661877</b>     | 0.004028 | F54F2.7   |                | An ortholog of human FAM206A, involved in locomotion                                              |
| <b>0.663227</b>     | 0.041844 | C16A11.9  | <i>fbxc-43</i> | F-box C protein                                                                                   |
| <b>0.66922</b>      | 0.034881 | C52E12.4  | <i>ist-6</i>   | An ortholog of human DENND5B, expressed in head neurons                                           |
| <b>0.68023</b>      | 0.043633 | F11C1.1   |                | An ortholog of human CHCHD4                                                                       |
| <b>0.682807</b>     | 0.016116 | H13N06.2  |                | An ortholog of human SLC35E2B                                                                     |
| <b>0.686958</b>     | 0.012506 | K10B2.2   | <i>ctsa-1</i>  | An ortholog of human CTSA, predicted to have serine-type carboxypeptidase activity                |
| <b>0.689195</b>     | 0.003127 | Y39B6A.33 |                | An ortholog of mammalian GLTSCR2/PICT1, expressed in body wall muscle                             |
| <b>0.691668</b>     | 0.020361 | H06H21.10 | <i>tat-2</i>   | Putative P-type ATPase, expressed in pharyngeal cell, intestine                                   |
| <b>0.698465</b>     | 0.020347 | ZC434.3   |                |                                                                                                   |
| <b>0.711247</b>     | 0.048998 | T19D12.7  | <i>oig-8</i>   | Expressed in excretory cell, and several neuron                                                   |
| <b>0.713881</b>     | 0.037381 | F56C9.7   |                | DUF1261 domain, expressed in intestine                                                            |
| <b>0.725492</b>     | 0.030913 | R193.2    |                |                                                                                                   |
| <b>0.73886</b>      | 0.036512 | D1025.4   | <i>nspc-20</i> | Expressed in intestine                                                                            |
| <b>0.738942</b>     | 0.041445 | R03G5.6   |                | Expressed in Dopaminergic neuron                                                                  |
| <b>0.739968</b>     | 0.046336 | Y32F6A.5  |                | An ortholog of human SCPEP1 (serine carboxypeptidase 1);                                          |
| <b>0.740127</b>     | 0.019065 | K04C1.4   | <i>mlc-8</i>   | An ortholog of members of the human MYL (Myosin light chains)                                     |
| <b>0.741041</b>     | 0.045371 | DY3.3     | <i>hlh-16</i>  | An ortholog of human OLIG1 (oligodendrocyte transcription factor 1), expressed in several neurons |

|                 |          |         |               |                                                                                   |
|-----------------|----------|---------|---------------|-----------------------------------------------------------------------------------|
| <b>0.752337</b> | 0.039948 | T22B7.1 | <i>egl-13</i> | SOX domain transcription factor,<br>expressed in body wall muscle                 |
| <b>0.755058</b> | 6.01E-04 | F22F4.1 |               |                                                                                   |
| <b>0.758606</b> | 0.025408 | F59C6.7 | <i>che-13</i> | Involved in cilia structure maintenance,<br>expressed in ciliated sensory neurons |
| <b>0.759251</b> | 0.034832 | T03G6.3 |               | An ortholog of human ENPP6, expressed in body wall<br>muscle, vulva muscle        |

| Average Fold<br>Change | P-Value  | ORF name  | Gene name     | Description                                                                                                                 |
|------------------------|----------|-----------|---------------|-----------------------------------------------------------------------------------------------------------------------------|
| <b>3.798170243</b>     | 0.00667  | H11L12.1  |               |                                                                                                                             |
| <b>3.237735007</b>     | 0.01587  | F47G4.4   |               | Paralog of MEI-2, expressed in ciliated cells                                                                               |
| <b>2.874796969</b>     | 0.04843  | F26A1.8   |               | hypodermis, neurons                                                                                                         |
| <b>2.178378092</b>     | 0.019599 | Y55B1BM.1 | <i>stim-1</i> | An ortholog of STIM1, a putative calcium sensor of ER                                                                       |
| <b>1.977510254</b>     | 0.03369  | Y39A1A.9  |               | An ortholog of human C17orf104                                                                                              |
| <b>1.874846671</b>     | 0.022883 | C36C9.1   | <i>meg-4</i>  | Involved in P granule assembly, expressed pharynx,                                                                          |
| <b>1.819210897</b>     | 0.025027 | K06A9.2   |               | F-box protein                                                                                                               |
| <b>1.814827825</b>     | 0.041835 | F49E12.1  | <i>skpo-1</i> | Predicted to have heme binding activity and peroxidase<br>activity                                                          |
| <b>1.756865247</b>     | 0.018247 | W01B11.5  | <i>pqn-72</i> | Predicted to contain a glutamine/asparagine-rich domain                                                                     |
| <b>1.736272617</b>     | 0.013073 | F39D8.3   |               |                                                                                                                             |
| <b>1.719518165</b>     | 0.023733 | Y73F8A.9  | <i>pqn-91</i> | Predicted to contain a glutamine/asparagine-rich domain                                                                     |
| <b>1.707252705</b>     | 0.010207 | T19H12.9  | <i>ugt-12</i> | An ortholog of human UGT3A2 (UDP glycosyltransferase<br>3 family                                                            |
| <b>1.64639257</b>      | 0.01672  | DC2.7     | <i>kin-33</i> | An ortholog of human CHEK1                                                                                                  |
| <b>1.620972927</b>     | 0.022088 | F58G1.1   | <i>wago-4</i> | An ortholog of human ago4 (argonaute 4), predicted to<br>have nucleic acid binding activity                                 |
| <b>1.606301115</b>     | 0.003514 | C06G3.2   | <i>klp-18</i> | Kinesin motor protein                                                                                                       |
| <b>1.569667482</b>     | 0.017891 | K07A9.2   | <i>cmk-1</i>  | Ca <sup>2+</sup> /calmodulin-dependent protein kinase I (CaMK1),<br>expressed in intestine and nervous system               |
| <b>1.547598449</b>     | 0.016443 | T05E11.8  |               |                                                                                                                             |
| <b>1.541338416</b>     | 0.010039 | C01C7.1   | <i>ark-1</i>  | A homolog of the nonreceptor tyrosine kinase ACK                                                                            |
| <b>1.529836518</b>     | 0.049756 | T07D1.3   |               | Expressed in mechanosensory neurons                                                                                         |
| <b>1.509310668</b>     | 0.00914  | T05B4.4   |               | Pseudogene                                                                                                                  |
| <b>1.501722272</b>     | 0.024091 | F53B7.4   |               |                                                                                                                             |
| <b>1.490892345</b>     | 0.001891 | ZK154.6   |               |                                                                                                                             |
| <b>1.482809791</b>     | 0.049555 | F56C11.3  |               | An ortholog of human GFER (growth factor, augmenter of<br>liver regeneration), expressed in pharynx and body wall<br>muscle |

|                    |          |           |               |                                                                                                                            |
|--------------------|----------|-----------|---------------|----------------------------------------------------------------------------------------------------------------------------|
| <b>1.477134425</b> | 2.98E-04 | Y39B6A.42 |               |                                                                                                                            |
| <b>1.444970812</b> | 0.014734 | T04B2.5   | <i>ipla-7</i> | Phospholipase A2, expressed in intestine and pharynx,                                                                      |
| <b>1.436321867</b> | 0.034685 | C02F5.6   | <i>henn-1</i> | An ortholog of human HENMT1(HEN1 methyltransferase 1), expressed in germline and somatic cells                             |
| <b>1.436026615</b> | 0.04248  | K02E2.4   | <i>ins-35</i> | Insulin-related peptides, expressed in chemosensory neurons and intestine                                                  |
| <b>1.413174161</b> | 0.04906  | F49E12.9  | <i>drd-1</i>  | An ortholog of human FAXDC2 fatty acid hydroxylase domain containing 2), expressed in intestine,                           |
| <b>1.398690556</b> | 0.020844 | W03F9.5   | <i>ttb-1</i>  | An ortholog of human GTF2B (general transcription factor IIB)                                                              |
| <b>1.397883625</b> | 0.049615 | R06C7.5   | <i>adsl-1</i> | An ortholog of the human gene ADSL                                                                                         |
| <b>1.397439688</b> | 0.039337 | T16G1.9   |               | An ortholog of human BARD1 (BRCA1 associated RING domain 1)                                                                |
| <b>1.397406587</b> | 0.017579 | K10D2.1   |               | An ortholog of human HIRA (histone cell cycle regulator)                                                                   |
| <b>1.390562423</b> | 0.048425 | Y54G11A.2 |               | An ortholog of human CCDC25 (coiled-coil domain containing 25), expressed in intestine and pharynx                         |
| <b>1.379353843</b> | 0.020611 | C03A7.11  | <i>ugt-51</i> | An ortholog of human UGT3A2 (UDP glycosyltransferase 3 family, polypeptide A2)                                             |
| <b>1.378052477</b> | 0.015343 | T23G4.3   |               | Expressed in germline precursor cell and DA, VA neurons                                                                    |
| <b>1.375970497</b> | 0.03187  | Y46D2A.2  |               | Expressed in intestine, PVD, OLL neurons                                                                                   |
| <b>1.369860897</b> | 0.002261 | W01A11.1  |               | An ortholog of human EPHX1 (epoxide hydrolase 1), expressed in various tissues including intestine and reproductive system |
| <b>1.364948331</b> | 0.040949 | Y54H5A.2  |               | An ortholog of human HGH1 (HGH1)                                                                                           |
| <b>1.364275245</b> | 0.008916 | F49E8.2   |               |                                                                                                                            |
| <b>1.360203382</b> | 0.006114 | C38C3.5   | <i>unc-60</i> | Actin depolymerizing factor, actin binding protein, expressed in embryonic muscle,                                         |
| <b>1.354122316</b> | 0.011269 | C49F5.3   |               |                                                                                                                            |
| <b>1.344013553</b> | 0.022573 | B0511.13  |               | An ortholog of human MPPE1 (metallophosphoesterase 1);                                                                     |
| <b>1.341566644</b> | 0.004319 | T22H9.2   | <i>atg-9</i>  | An ortholog of human ATG9B (autophagy related 9B),                                                                         |
| <b>1.340625093</b> | 0.048429 | C05D10.3  | <i>wht-1</i>  | ATP-binding cassette (ABC) transporter, expressed in intestine                                                             |
| <b>1.337968899</b> | 0.041015 | Y37D8A.11 | <i>cec-7</i>  | An ortholog of human MORF4L2 (mortality factor 4 like 2)                                                                   |
| <b>1.335687868</b> | 0.020896 | PAR2.3    | <i>aak-1</i>  | Homologs of the catalytic alpha subunit of AMP-activated protein kinases (AMPKs)                                           |
| <b>1.329072479</b> | 0.00376  | C27D9.1   |               | An ortholog of members of the human FUT (Fucosyltransferases), involved in body morphogenesis                              |
| <b>1.328017301</b> | 0.021152 | Y52E8A.2  |               | Predicted to have zinc ion binding activity                                                                                |
| <b>1.323955193</b> | 0.008198 | D2013.3   |               |                                                                                                                            |

|                    |          |          |                |                                                                                                                    |
|--------------------|----------|----------|----------------|--------------------------------------------------------------------------------------------------------------------|
| <b>1.313432752</b> | 0.030264 | Y87G2A.3 | <i>atg-4.1</i> | A putative cysteine protease orthologous to the human ATG4A, expressed in intestine, renal gland cells and neurons |
| <b>1.304450971</b> | 0.037905 | F59H5.1  | <i>gbas-1</i>  | DUF545 motif, expressed in head neuron ganglia, intestine and hypodermal cells                                     |
