# Supplementary material
Source: publisher figshare collection journal article supplement (https://gsajournals.figshare.com/articles/dataset/_/8993831)
Supplement: Supplementary file 7 [file 1]

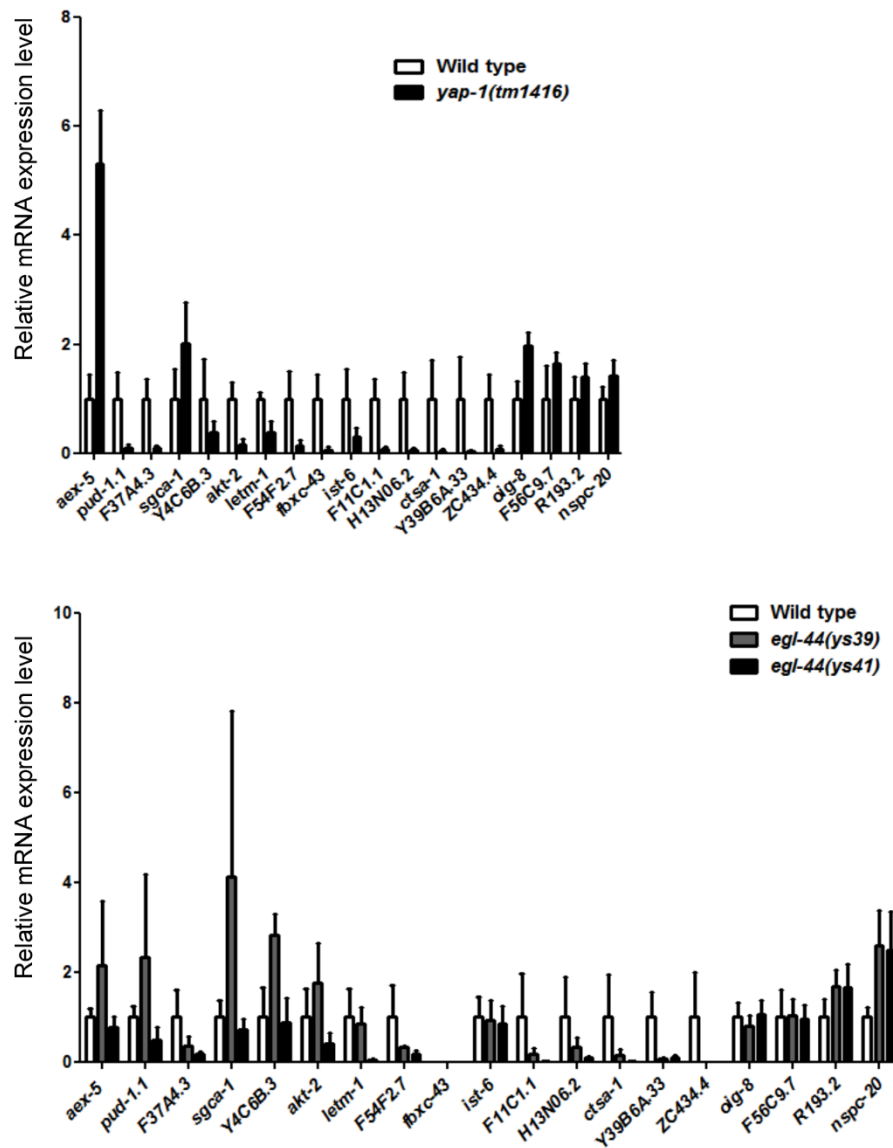

**Figure S4. Validation of candidates for target genes of YAP-1 and EGL-44 complex.** Relative mRNA levels of each candidate gene from the microarray experiment in *yap-1(tm1416)*, *egl-44(ys39)*, *egl-44(ys41)*. Among the top-ranked 20 genes that were downregulated in *yap-1(ys38)*, eight genes including *tat-2* (*F37A4.3*, *F54F2.7*, *F11C1.1*, *H13N06.2*, *ctsa-1*, *Y39B6A.33*, *tat-2* (Figure S5) and *ZC434.4*) were consistently downregulated in every mutant background tested.
